# Supplementary material for: Differential Requirement for IRGM Proteins during Tuberculosis Infection in Mice
Source: PubMed Central journal article supplement (PMC9933630; doi:10.1128/iai.00510-22), 2023-01-11
Supplement: iai.00510-22-s0002.pdf [file iai.00510-22-s0002.pdf]

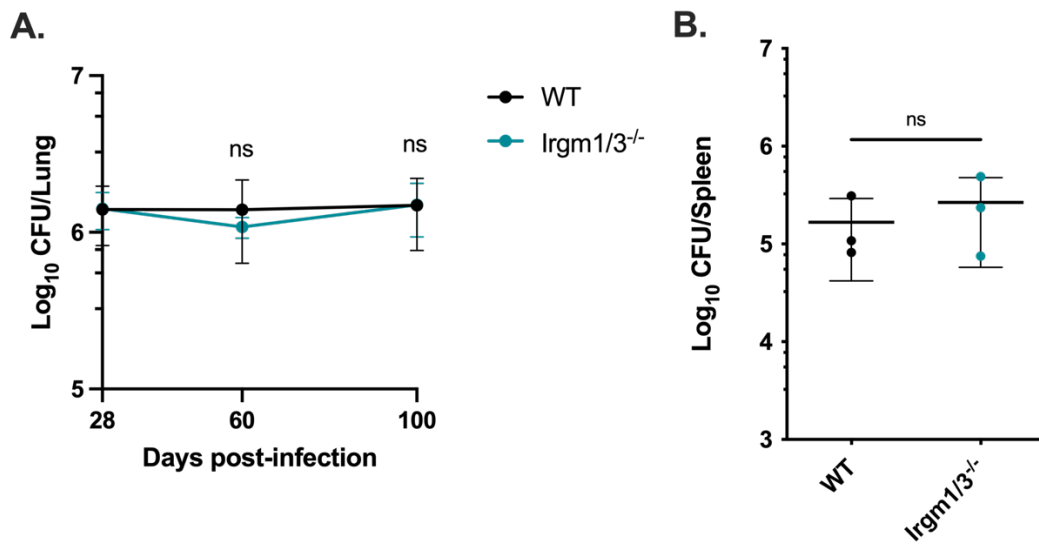

**FIG S1. *Irgm1/3*<sup>-/-</sup> mouse TB phenotypes during long-term infection.** Following aerosol infection with *Mtb* H37Rv (Day 0 dose of 50-150 CFUs), CFUs were quantified from the lungs (A) and spleens (B) of mice at 60- and 100-days post-infection (A) or 100 days post-infection (B). Each point represents a single mouse, data are from one experiment, with 3-4 female mice per group. Statistics were determined via Mann-Whitney test (ns = not significant).

**A.**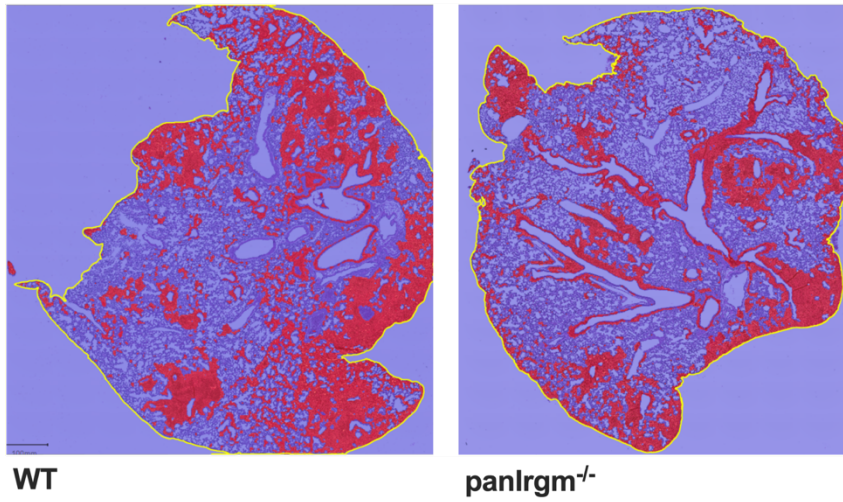**B.**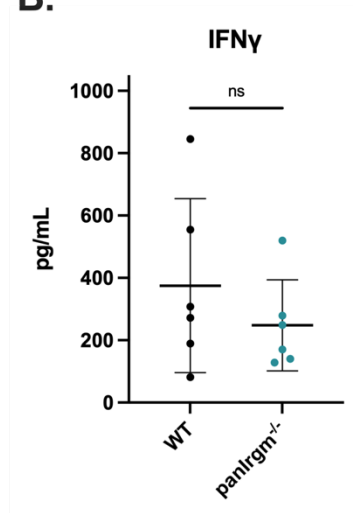

**FIG S2. Lung damage quantification and phenotyping of panIrgm<sup>-/-</sup> mice at 5 weeks post-infection** (A) QuPath pixel classifier estimates of relative damaged area in representative H&E-stained lung sections from mice, collected at 5 weeks post-infection. (B) IFN $\gamma$  cytokine concentration in lung homogenates from infected mice at 5 weeks post-infection. Statistics were determined via Mann-Whitney test (ns = not significant).

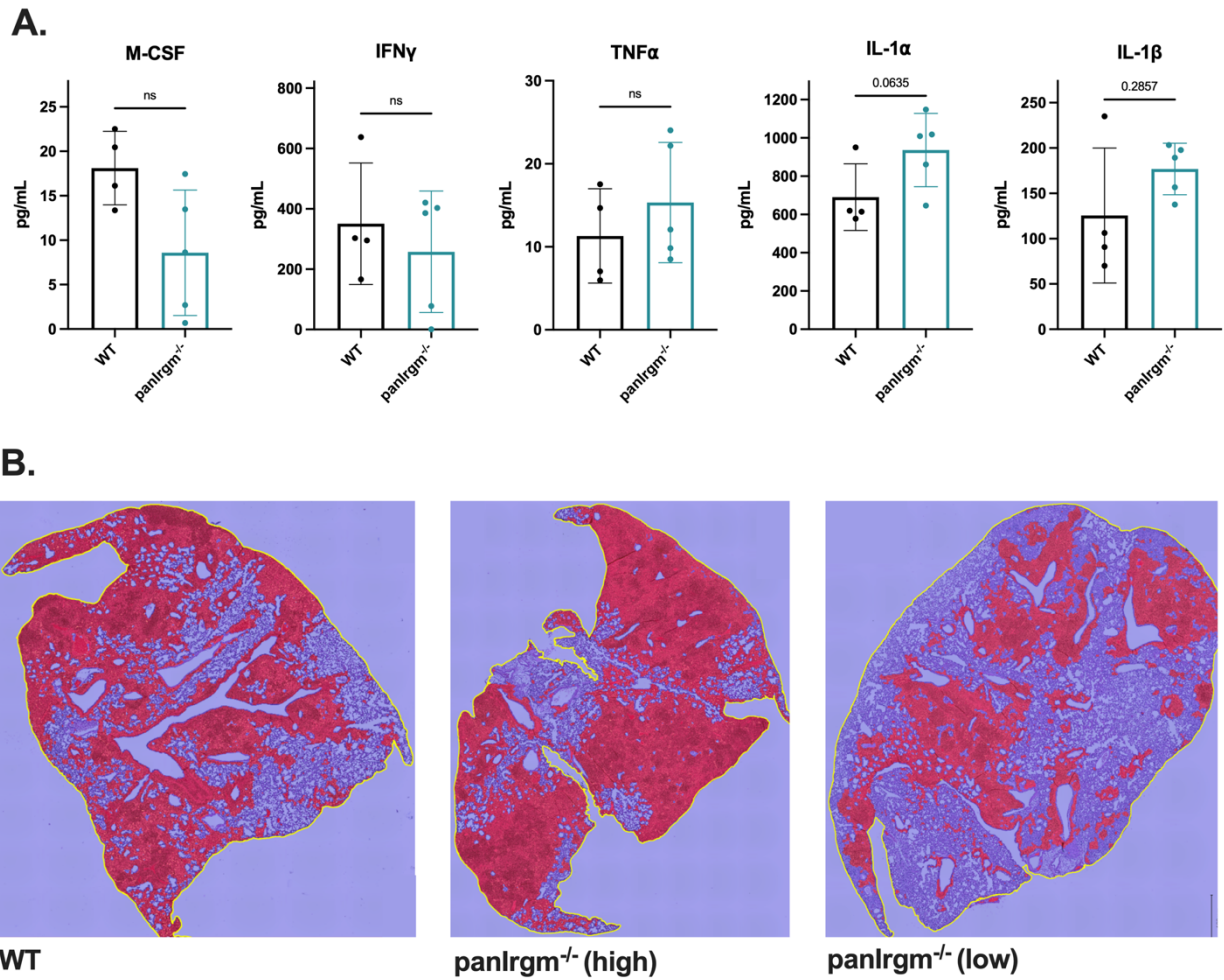

**FIG S3. Lung damage quantification and phenotyping of panIrgm<sup>-/-</sup> mice at 24 weeks post-infection** (A) Concentration of cytokines in lung homogenates from infected female mice at 24 weeks post-infection. Statistics were determined by Mann-Whitney test (ns = not significant, or exact *P* value shown for trends above significance threshold). (B) QuPath pixel classifier estimates of relative damaged area in representative H&E-stained lung sections from mice, collected at 24 weeks post-infection.
